# Supplementary material
Source: Springer Nature journal article supplement (https://www.springermedizin.de/resource/supplementary/12879_2013_3086_MOESM4_ESM.pdf/9445966)
Supplement: MOESM4 [file 9445966]

12 patients were assessed for eligibility

7 patients met one or more exclusion criteria, or did not provide informed consent

6 patients were randomized

3 patients were assigned to receive IFN- $\gamma$

3 patients were assigned to receive placebo

5 patients who did not meet the inclusion criteria were treated with IFN- $\gamma$  as "therapy of last resort"

3 patients were included in the analysis at day 28

3 patients were included in the analysis at day 28

5 patients were included in the analysis at day 28

---

In total, 11 patients were analyzed :  
3 study patients and 5 "last resort"  
patients received IFN- $\gamma$
